# Supplementary material
Source: HighWire-hosted journal article supplement (https://jnm.snmjournals.org/highwire/filestream/95340/field_highwire_adjunct_files/0/210393_Supplemental_Data.pdf)
Supplement: 210393_Supplemental_Data.pdf [file 210393_Supplemental_Data.pdf]

**Supplemental Table 1:** Neuropsychological assessments in Community Controls (Com-CON) and Gene-Negative controls from HD families (Gen-Neg-CON)

|                           | <i>Com-CON</i><br>( <i>n</i> = 12) | <i>Gen-Neg-CON</i><br>( <i>n</i> = 15) | <i>p</i> <sup>a</sup> |
|---------------------------|------------------------------------|----------------------------------------|-----------------------|
| <i>Cognition</i>          |                                    |                                        |                       |
| MMSE                      | 30.0 (28.5-30.0)                   | 30.0 (30.0-30.0)                       | n.s.                  |
| RAVLT (total A1-A5)       | 57.25 ± 10.49                      | 54.60 ± 6.97                           | n.s.                  |
| RAVLT retention A7        | 12.67 ± 1.92                       | 13.07 ± 1.67                           | n.s.                  |
| RAVLT recognition A8      | 15.0 (14.0-15.0)                   | 15.0 (15.0-15.0)                       | n.s.                  |
| BNT                       | 57.0 (55.0-58.0)                   | 56.0 (52.0-58.0)                       | n.s.                  |
| TMT A (sec)               | 29.58 ± 12.79                      | 28.6 ± 7.9                             | n.s.                  |
| TMT B (sec)               | 49.0 (43.5-58.5)                   | 58.5 (51.0-63.0)                       | n.s.                  |
| STROOP word reading       | 44.42 ± 7.20                       | 42.33 ± 7.56                           | n.s.                  |
| STROOP color naming       | 55.92 ± 13.84                      | 51.20 ± 8.90                           | n.s.                  |
| STROOP interference       | 83.17 ± 18.16                      | 82.80 ± 14.89                          | n.s.                  |
| NART                      | 45.17 ± 4.11                       | 50.0 (49.0-50.0)                       | 0.01                  |
| DS forward                | 6.5 (5.0-7.0)                      | 6.53 ± 1.19                            | n.s.                  |
| DS backward               | 5.17 ± 1.34                        | 5.0 (4.0-6.0)                          | n.s.                  |
| VF animal                 | 21.5 (21.0-25.5)                   | 24.33 ± 5.63                           | n.s.                  |
| VF N                      | 12.67 ± 4.31                       | 12.27 ± 6.06                           | n.s.                  |
| VF A                      | 12.08 ± 3.42                       | 13.73 ± 2.31                           | n.s.                  |
| VF K                      | 13.83 ± 5.13                       | 14.73 ± 4.35                           | n.s.                  |
| Digit symbol              | 78.75 ± 17.05                      | 85.27 ± 11.66                          | n.s.                  |
| Block patrons             | 67.5 (65.0-68.0)                   | 67.0 (61.0-68.0)                       | n.s.                  |
| <i>Mood and Behaviour</i> |                                    |                                        |                       |
| BDI                       | 2.0 (1.0-7.5)                      | 1.0 (0.0-4.0)                          | n.s.                  |
| STAI 1                    | 47.00 ± 3.02                       | 46.33 ± 4.48                           | n.s.                  |
| STAI 2                    | 47.58 ± 4.25                       | 48.00 ± 3.66                           | n.s.                  |
| PBA-HD total              | 1.0 (0.0-2.0)                      | 3.08 ± 3.15                            | n.s.                  |
| PBA-HD apathy             | 0.0 (0.0-0.0)                      | 0.0 (0.0-0.0)                          | n.s.                  |
| PBA-HD irritability       | 0.0 (0.0-0.0)                      | 0.0 (0.0-0.0)                          | n.s.                  |
| PBA-HD depression         | 0.0 (0.0-1.0)                      | 1.0 (0.0-1.0)                          | n.s.                  |

Normally distributed data are reported as mean  $\pm$  standard deviation. Skewed data are reported as median (quartile 1 – quartile 3).

<sup>a</sup> Results surviving Kruskal-Wallis test and Bonferroni test for correction for multiple comparisons.

n.s. = not significant (even before post-hoc testing); Com-CON = community control group; Gene-Neg-CON = gene-negative controls from HD families; MMSE = Mini-Mental State Examination, RAVLT = Rey Auditory Verbal Learning Test; BNT = Boston Naming Test; TMT = Trail Making Test; NART = National Adult Reading Test; DS = Digit span; VF N, A, K = verbal fluency for the letters N, A and K; BDI = Beck Depression Inventory; STAI = State-Trait Anxiety Inventory; PBA = Problem Behavior Assessment.

**Supplemental Table 2:** Grey matter volume differences between premanifest Huntington's disease subjects (preHD) and healthy controls (CON).

| Cluster-level         |                | Voxel-level        |      | Peak voxel MNI coordinate |     |     | Cluster location                       |
|-----------------------|----------------|--------------------|------|---------------------------|-----|-----|----------------------------------------|
| p <sub>cor</sub>      | k <sub>E</sub> | p <sub>unc</sub>   | T    | x                         | y   | z   |                                        |
| <i>preHD &lt; CON</i> |                |                    |      |                           |     |     |                                        |
| 2.10 <sup>-6</sup>    | 1188           | 5.10 <sup>-5</sup> | 4.28 | 26                        | 14  | 8   | R anterior putamen                     |
|                       |                | 1.10 <sup>-4</sup> | 3.99 | 20                        | 17  | -11 | R nucleus accumbens                    |
|                       |                | 4.10 <sup>-4</sup> | 3.66 | 17                        | 3   | -11 | R amygdala                             |
|                       |                | 5.10 <sup>-4</sup> | 3.58 | 23                        | 20  | 2   | R anterior putamen                     |
|                       |                | 7.10 <sup>-4</sup> | 3.42 | 18                        | 20  | 0   | R caudate nucleus                      |
|                       |                | 0.001              | 3.23 | 24                        | 2   | -6  | R globus pallidus                      |
|                       |                | 0.002              | 3.12 | 11                        | 23  | 5   | R caudate nucleus                      |
|                       |                | 0.002              | 3.07 | 9                         | 6   | -9  | R nucleus accumbens                    |
|                       |                | 0.003              | 2.92 | 26                        | 0   | 11  | R posterior putamen                    |
| 1.10 <sup>-6</sup>    | 1561           | 7.10 <sup>-5</sup> | 4.24 | -23                       | 11  | 8   | L anterior putamen                     |
|                       |                | 1.10 <sup>-4</sup> | 4.06 | -20                       | 15  | -12 | L anterior orbitofrontal gyrus (BA 11) |
|                       |                | 1.10 <sup>-4</sup> | 3.98 | -21                       | 21  | -2  | L anterior putamen                     |
|                       |                | 2.10 <sup>-4</sup> | 3.82 | -23                       | 17  | -2  | L anterior putamen                     |
|                       |                | 3.10 <sup>-4</sup> | 3.71 | -21                       | 14  | -8  | L anterior putamen                     |
|                       |                | 4.10 <sup>-4</sup> | 3.65 | -11                       | 18  | -5  | L nucleus accumbens                    |
|                       |                | 0.001              | 3.55 | -29                       | -2  | 11  | L posterior putamen                    |
|                       |                | 0.001              | 3.45 | -23                       | -6  | 8   | L posterior putamen                    |
|                       |                | 0.001              | 3.23 | -29                       | -12 | 11  | L posterior putamen                    |
|                       |                | 0.002              | 3.00 | -8                        | 5   | -5  | L globus pallidus                      |
| 0.025                 | 482            | 2.10 <sup>-4</sup> | 3.89 | -38                       | 15  | 35  | L middle frontal gyrus (BA 44)         |
|                       |                | 3.10 <sup>-4</sup> | 3.77 | -33                       | 14  | 33  | L middle frontal gyrus (BA 44)         |
|                       |                | 3.10 <sup>-4</sup> | 3.75 | -38                       | 15  | 29  | L middle frontal gyrus (BA 44)         |
|                       |                | 4.10 <sup>-4</sup> | 3.63 | -41                       | 12  | 30  | L middle frontal gyrus (BA 44)         |
|                       |                | 0.001              | 3.50 | -33                       | 14  | 24  | L insula                               |
|                       |                | 0.001              | 3.47 | -41                       | 8   | 29  | L insula                               |

Detailed cluster peak locations and p-values of the voxel-based morphometry analysis at  $p_{unc} < 0.005$  with cluster extent ( $K_E$ ) 250 voxels.

$K_E$ , cluster size extent (number of  $2 \times 2 \times 2 \text{ mm}^3$  voxels);  $p_{cor}$ , corrected for multiple comparisons;  $p_{unc}$ , uncorrected for multiple comparisons; L, left; R, right.

**Supplemental Fig 1** Striatal grey matter volumes (normalized to total intra-cranial volume) in community controls (Com-CON) and gene-negative controls from HD families (Gen-Neg-CON).

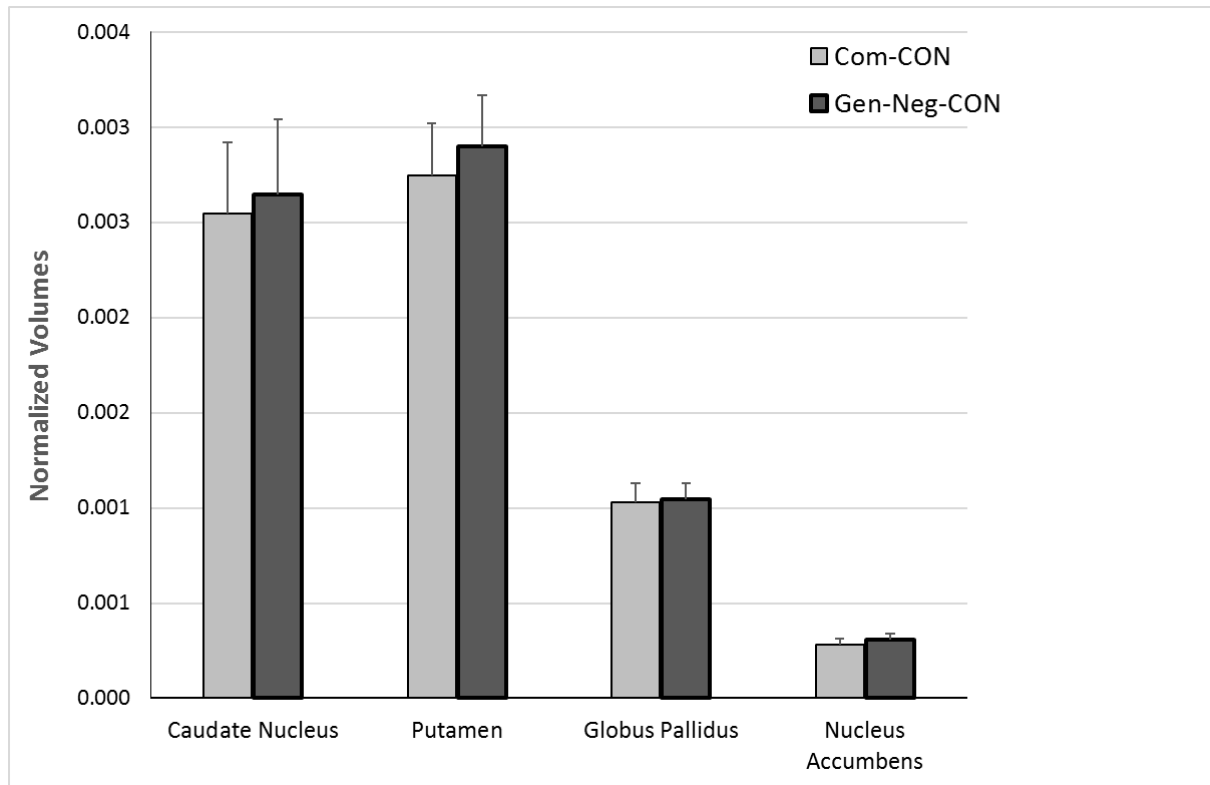

**Supplemental Fig 2** CB<sub>1</sub> receptor (CB<sub>1</sub>R) availability (expressed in modified standardized uptake value, mSUV) in community controls (Com-CON) and gene-negative controls from HD families (Gen-Neg-CON) after PVE correction.

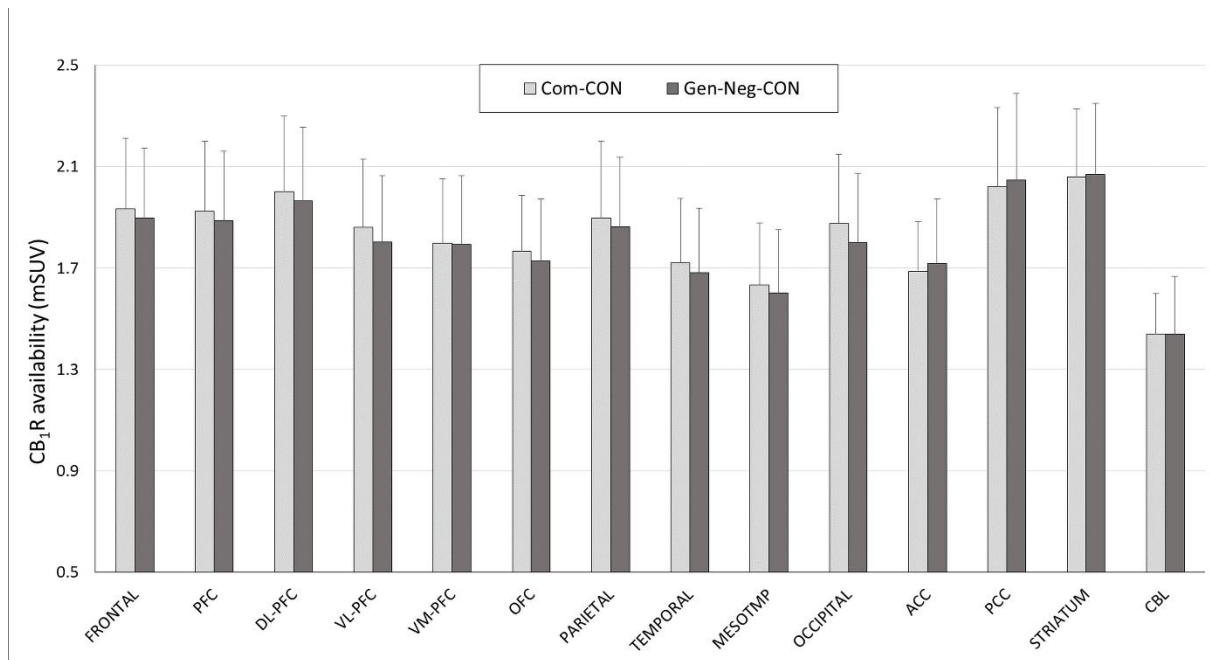

There were no significant differences in any region (range  $p = 0.5 - 0.9$ ).

PFC = prefrontal cortex; DL-PFC = dorsolateral prefrontal cortex; VL-PFC = ventrolateral prefrontal cortex; VM-PFC = ventromedial prefrontal cortex; OFC = orbitofrontal cortex; Mesotmp = mesotemporal lobe; ACC = anterior cingulate cortex; PCC = posterior cingulate cortex; CBL = cerebellum. Error bars represent SD.

**Supplemental Fig 3** Positive correlations between individual scores for factor 1 varimax normalized and CB<sub>1</sub>R availability in prefrontal cortex (PFC) regions (PFC:  $r = 0.61$ ,  $p = 0.036$ ; ventromedial prefrontal cortex, VM-PFC:  $r = 0.69$ ,  $p = 0.013$ ) and anterior cingulate cortex (ACC:  $r = 0.67$ ,  $p = 0.018$ ).

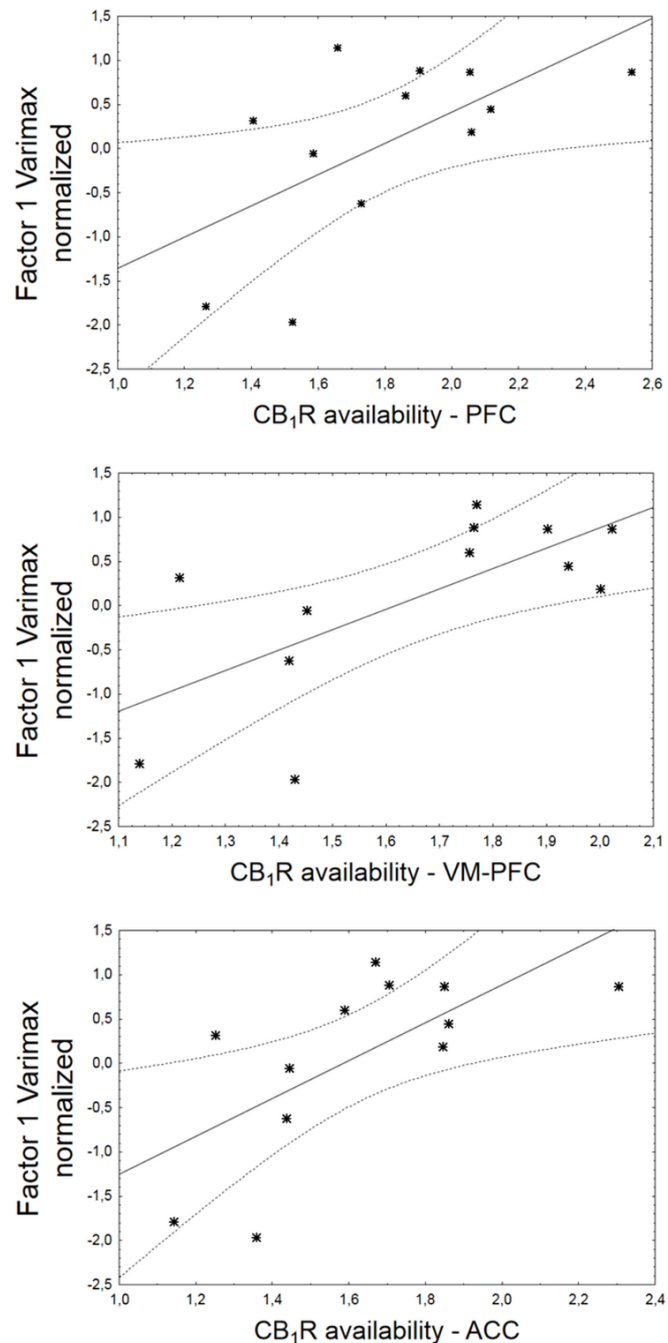

Solid lines represent linear regression curve and dotted lines represent 95% confidence interval.
